# Supplementary material
Source: PubMed Central journal article supplement (PMC3462636)
Supplement: supp_tpc.112.101006_tpc101006Supplemental.pdf [file supp_tpc.112.101006_tpc101006Supplemental.pdf]

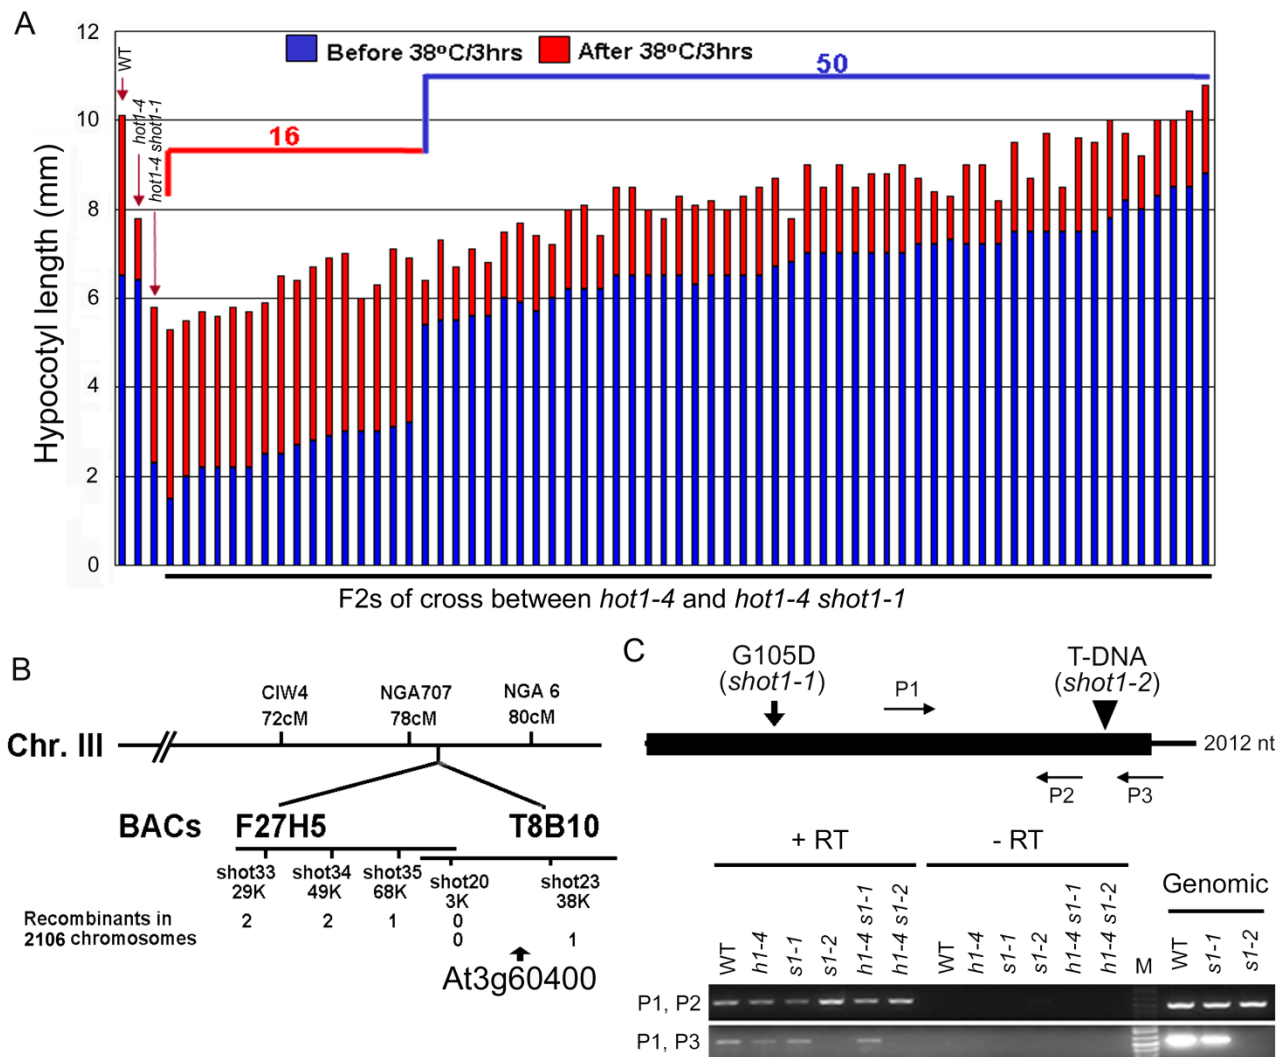

**Supplemental Figure 1.** Segregation of the *shot1* mutation, map based cloning, and RT-PCR in *shot1* mutants.

(A) Segregation analysis of the suppressor phenotype and short hypocotyl phenotype. Hypocotyl growth of F2 individuals of a cross between *hot1-4* and *hot1-4 shot1-1*, before (blue bar) and after (red bar) heat treatment (38°C/3h), is shown on the y-axis. (B) Map-based cloning locates the suppressor gene on chromosome 3 (At3g60400). (C) Location of the missense allele, *shot1-1*, and the T-DNA insertion allele, *shot1-2*, on the *SHOT1* gene structure and RT-PCR of *SHOT1* gene in wild-type and *shot1* mutants. Note that the *SHOT1* gene has no introns, so no reverse transcriptase (-RT) control is included. Amplification from genomic DNA is also included as a control. RT-PCR reactions were performed to test whether the mutations affect the expression of

*SHOT1* with the following primers: P1, ATTGAAGAATCTGCCTTATGTGCT; P2, CTCCACAAGCCACTTATGGAATCTA; P3, CTATGAAGGCCTTTTCGCTTG. M: DNA ladder. WT: Wild-type, *h1-4*: *hot1-4*, *s1-1*: *shot1-1*, *s1-2*: *shot1-2*.

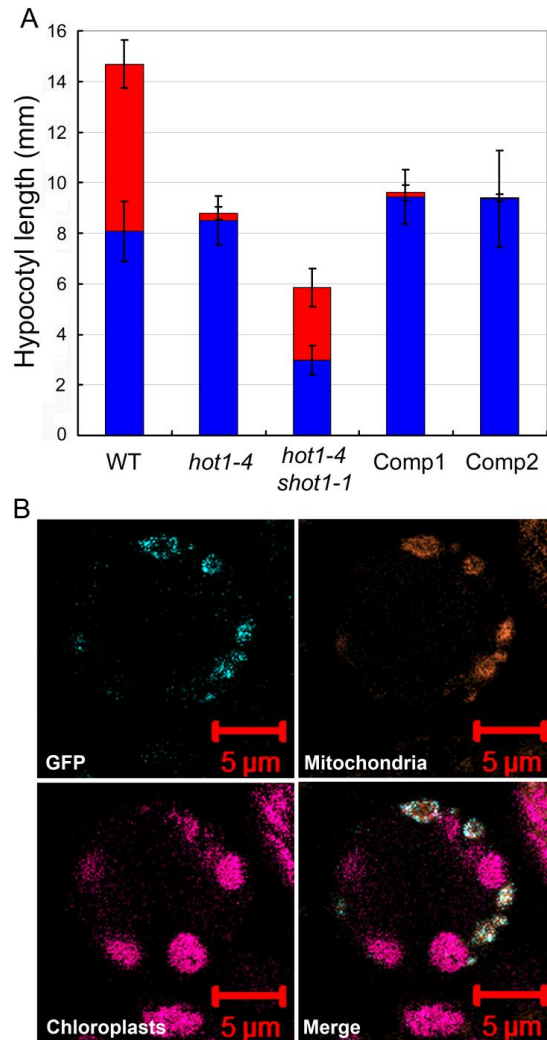

**Supplemental Figure 2.** SHOT1-GFP localizes to mitochondria. (A) Hypocotyl elongation assay shows that two independent homozygous T3 plants (Comp1 and Comp2) carrying *SHOT1-GFP* under the 35S promoter complement the phenotype of the *hot1-4 shot1-1*. Hypocotyl growth before (blue bars) and after (red bars) heat treatment ( $AC > 45^{\circ}C/1h$ ) is shown. Error bars indicate standard deviation.  $N \geq 8$ . (B) *35Spro::SHOT1-GFP* construct was made by inserting the coding sequence of the *SHOT1* gene in front of GFP in the pCGTNG vector (GenBank accession number: DQ370425, provided by Dr. David Galbraith at the University of Arizona). The construct was transformed into *hot1-4 shot1-1* plants. T3 homozygous plants were obtained and confirmed to complement the *shot1-1* mutation. Leaves from homozygous plants were processed to isolate protoplasts

according to Sheen (Sheen, 1995).

Protoplasts were visualized under a confocal microscope (LSM model 510 META microscope, Zeiss). Mitochondria were stained with 0.5  $\mu$ M MitoTracker Orange CMTMRos (Invitrogen) in 10 mM MES/KOH buffer, pH5.7 for 30 min and washed twice with the buffer to remove excess dye.

The Meta module was used to perform spectral imaging at excitation wavelengths of 488 nm (for GFP) and 543 nm (for MitoTracker Orange) simultaneously. The images were processed for linear unmixing to discriminate GFP fluorescence from fluorescence that originated from autofluorescence and the MitoTracker dye.

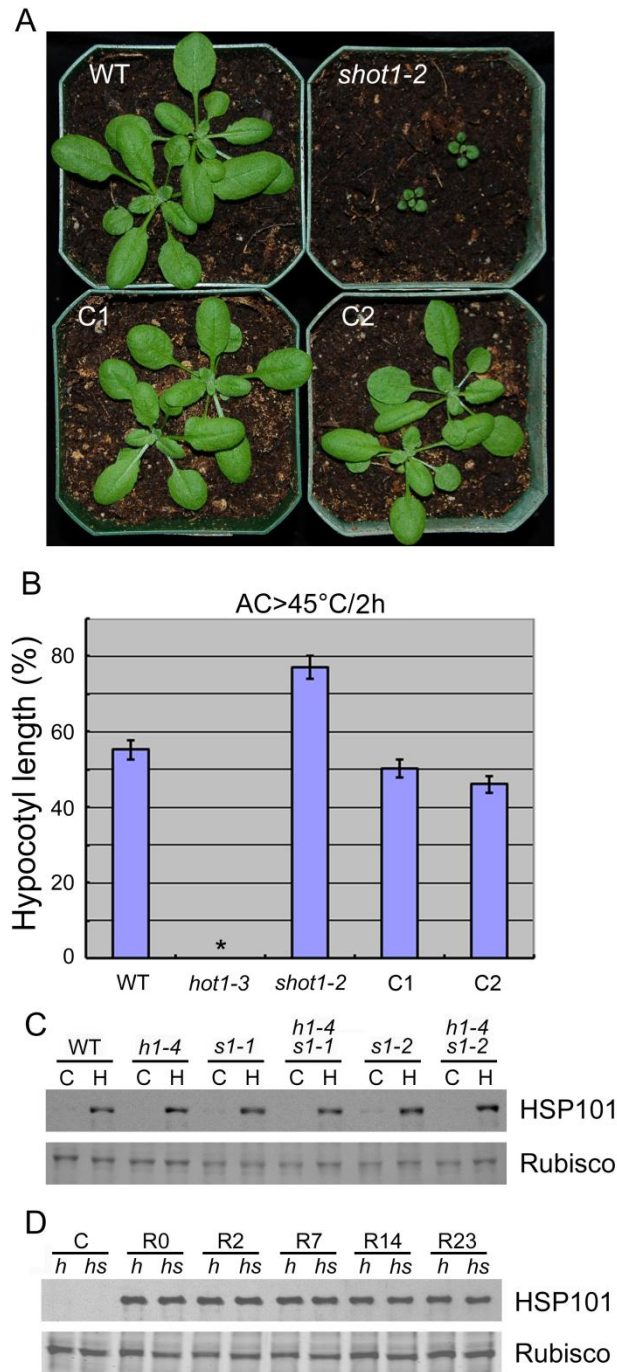

**Supplemental Figure 3.** Complementation analysis and HSP101 protein level in *shot1* mutants. **(A)** Complementation of the growth phenotype of the *shot1-2* mutation by wild-type genomic DNA. All plants are three weeks old. **(B)** Complementation of the heat stress phenotype of *shot1-2* by wild-type genomic DNA. Hypocotyl length after heat treatment is shown relative to the length without heat treatment. The error bars

indicate standard errors of 12 samples. Asterisk indicates no growth after the heat treatment. C1 and C2 are two independent T3 homozygous transgenic plants transformed with *SHOT1* genomic DNA in *shot1-2* background. WT: wild-type. (C) HSP101 protein in *shot1* mutants accumulates to a similar level as in wild-type. Total protein extracts were prepared from 2.5-day-old dark-grown seedlings with (H) or without (C) heat treatment (AC>45°C/1h). (D) HSP101 protein level during recovery after heat treatment (AC>45°C/1h) is not significantly different between *hot1-4* (*h*) and *hot1-4 shot1-2* (*hs*) plants. Total protein was extracted before (C) and after the heat treatment at different recovery time points, R0: right after the heat treatment, R2: 2h after the heat treatment, R7: 7h after the heat treatment, R14: 14h after the heat treatment, and R23: 23h after the heat treatment.

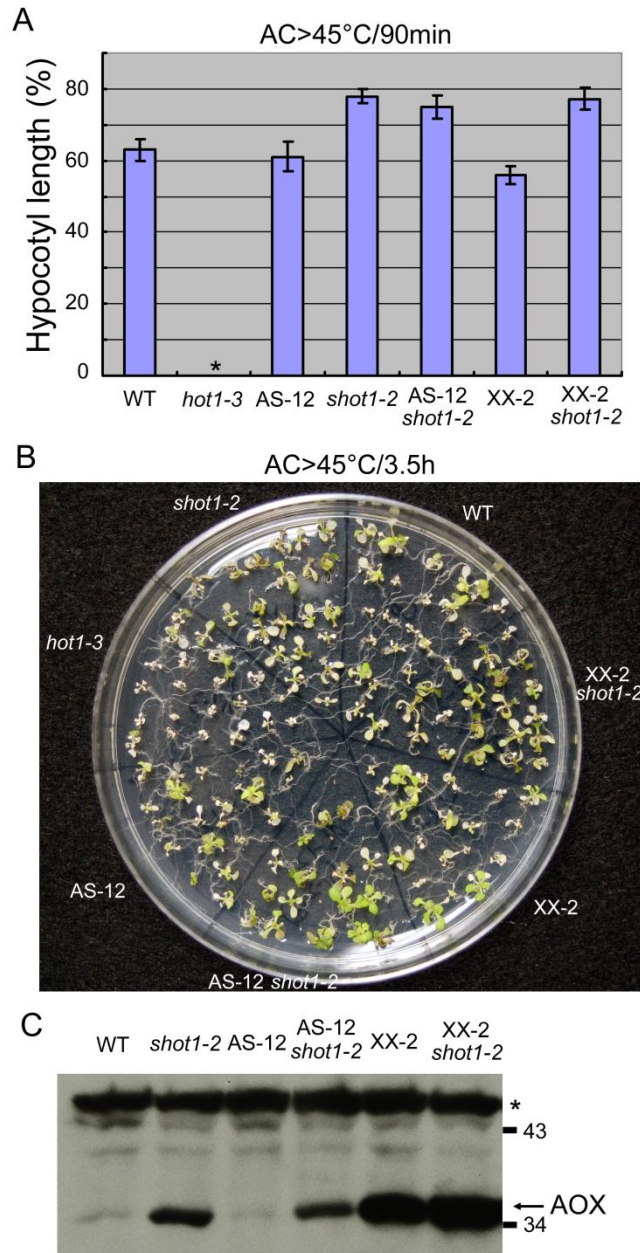

**Supplemental Figure 4.** Heat stress phenotype of transgenic plants with altered AOX1a protein level. **(A)** Hypocotyl length after heat treatment is shown relative to the length without heat treatment. The error bars indicate standard errors of 12 samples. Asterisk indicates no growth after the heat treatment. **(B)** Heat tolerance test on light-grown seedlings. **(C)** Immunoblot analysis of AOX protein level. Protein was extracted from light-grown seedlings after heat treatment (AC>45°C/2h). Asterisk indicates cross-reacting bands for loading control. WT: Wild-type, AS-12: AOX1a antisense line, XX-2: AOX1a over-expression line.

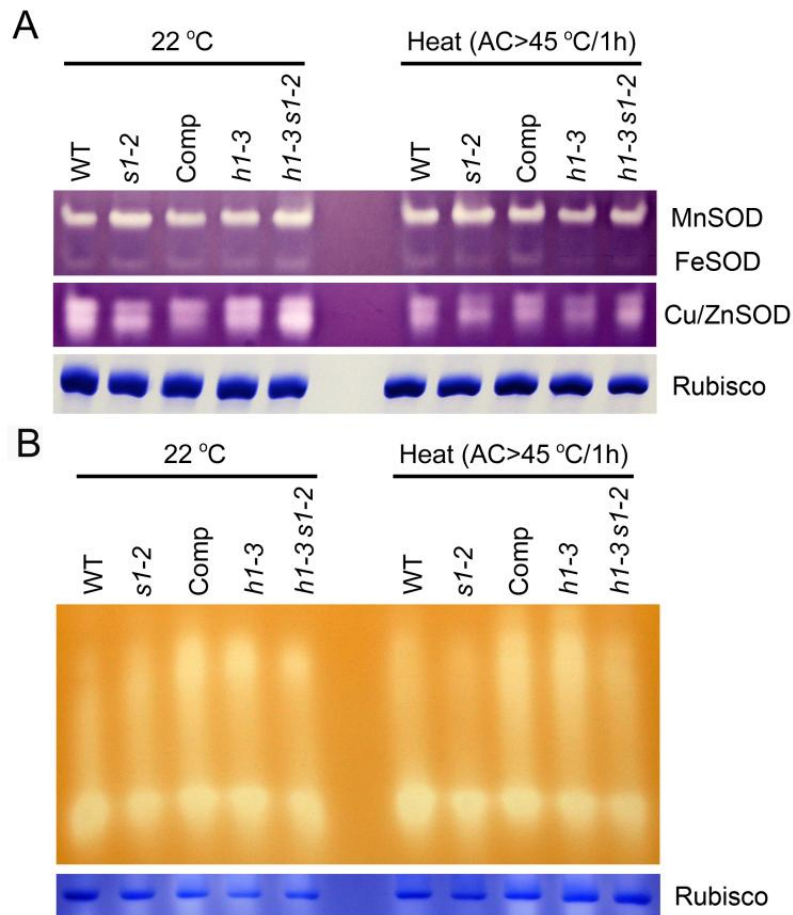

**Supplemental Figure 5.** Plants with the *shot1-2* mutation have slightly higher manganese superoxide dismutase activity but lower catalase activity. **(A)** 10-day-old seedlings grown on agar plates were treated with or without heat shock (AC>45 °C/1h). 30 µg of total protein was separated and stained for superoxide dismutase (SOD) activity as described in Miura et al. (2010). 10 µg of total protein was separated for Coomassie blue staining of Rubisco. **(B)** 10-day-old seedlings grown on agar plates were treated with or without heat shock (AC>45 °C/1h). 10 µg of total protein was separated and stained for catalase activity as described in Frugoli et al. (1996). The gel was later stained with Coomassie blue to determine equal loading. The experiments were performed twice (two biological replicates) with similar results. Comp: complemented *shot1-2* line, *s1-2*: *shot1-2*, *h1-3*: *hot1-3*.



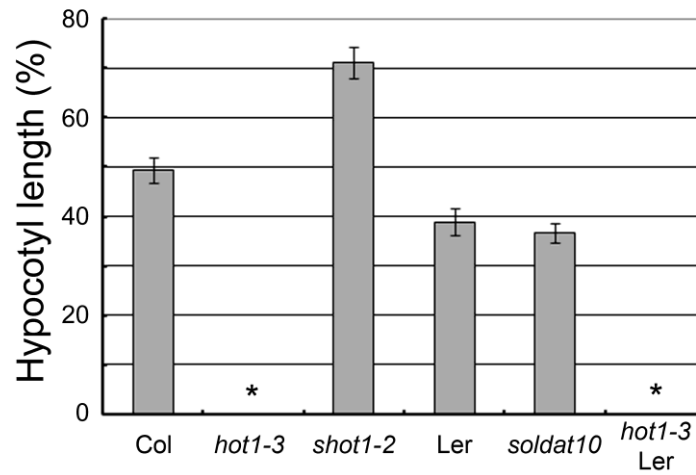

**Supplemental Figure 6.** The chloroplast mTERF mutant *soldat10* does not show increased heat tolerance. Hypocotyl length after heat treatment ( $AC > 45^{\circ}C/120min$ ) is shown relative to the length without heat treatment. Col: Columbia-0 wild-type for *hot1-3* and *shot1-2*. Ler: Landsberg erecta wild-type for *soldat10*. *hot1-3* Ler: *hot1-3* mutation introgressed into Ler eight times. Asterisk indicates no growth after heat treatment. The error bars indicate standard errors of at least 10 seedlings.

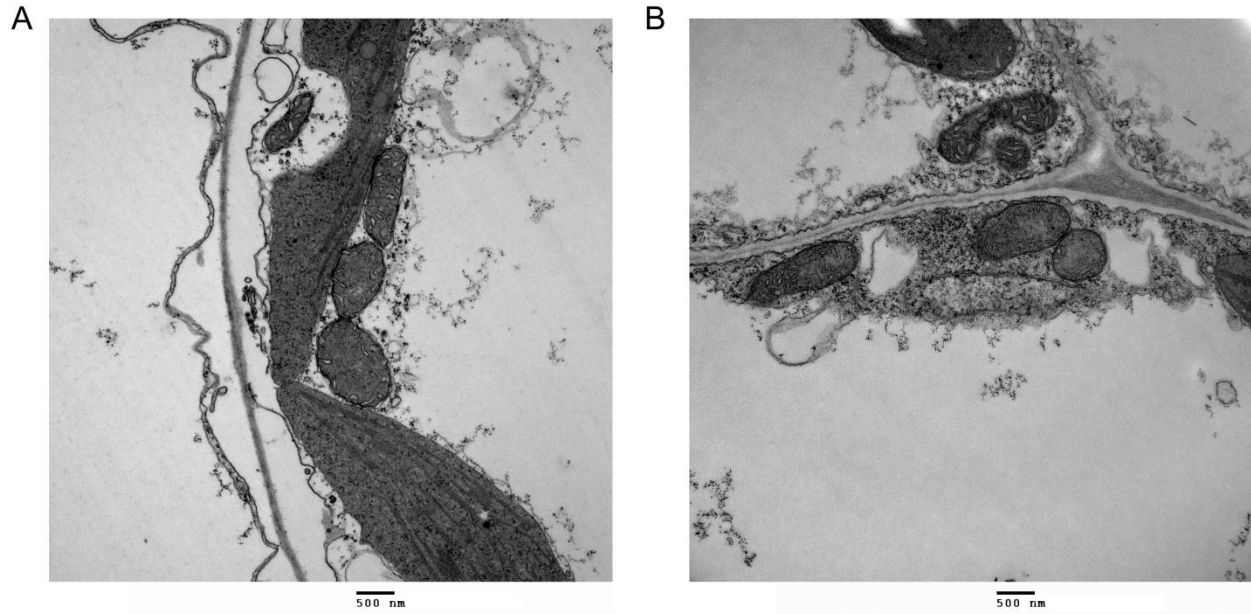

**Supplemental Figure 7.** Mitochondria appear normal in *shot1-2*. **(A)** Mitochondria from wild-type leaves. **(B)** Mitochondria from *shot1-2* leaves. Scale bars represent 500 nm. 10-day-old plate-grown seedlings were fixed with 2.5% glutaraldehyde, 2% paraformaldehyde, 0.1 M cacodylate (pH 7.3) under vacuum for 3 h at room temperature. Fixation was continued overnight at 4 °C, followed by a second fixation in 1% osmium tetroxide and 0.1 M cacodylate (pH7.3) in a microwave (85 Watts for total 6 min) under vacuum and 1 hr incubation at room temperature. The specimens were dehydrated through a series of ethanol concentrations and embedded in Spurr's resin. 70nm sections were cut onto uncoated 150 mesh copper grids, stained with 2% lead citrate for 2 min and observed with an FEI CM12S electron microscope operated at 80kv.

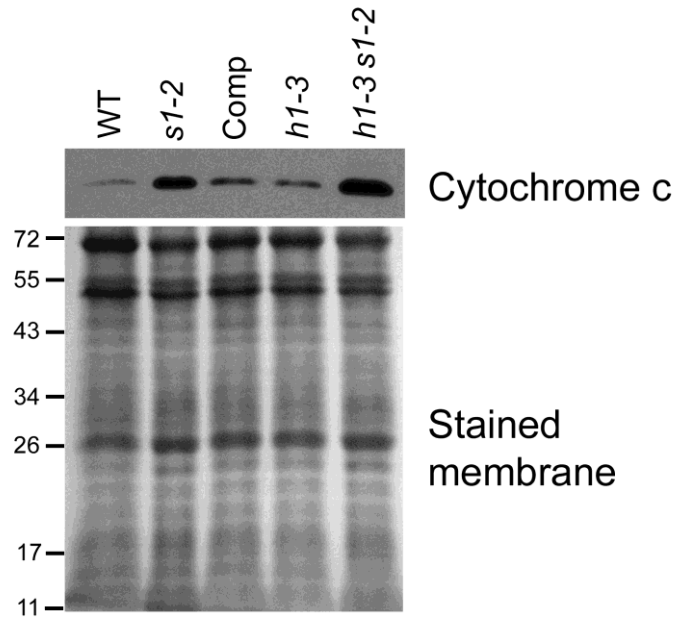

**Supplemental Figure 8.** Immunoblot analysis of cytochrome c level in the *shot1* mutants. A mitochondria-enriched fraction was separated by SDS-PAGE. Stained membrane is shown to check for transfer efficiency and equal loading. *s1-2*: *shot1-2*, Comp: complemented *shot1-2* line.

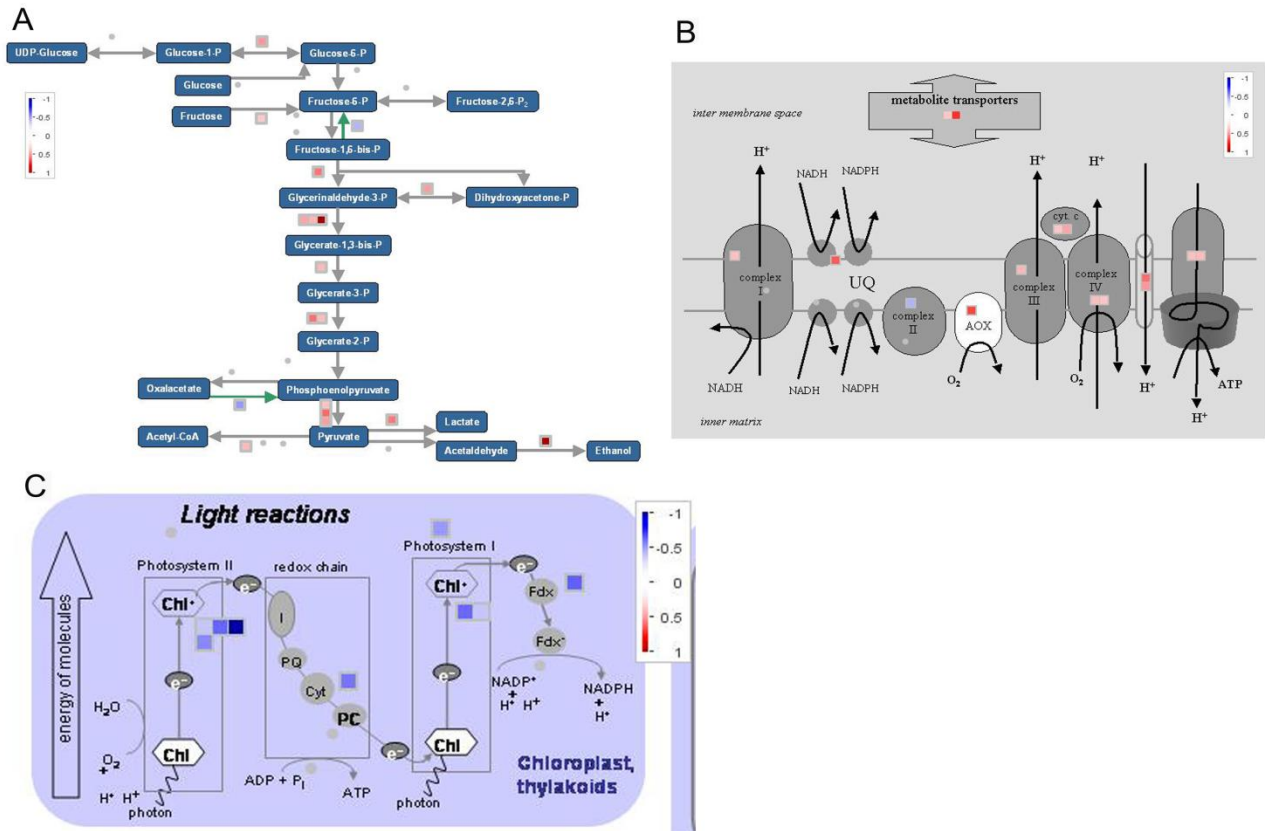

**Supplemental Figure 9.** Changes in transcript levels of genes involved in glycolysis, mitochondrial ETC and chloroplastic ETC of 22 °C-grown plants. MAPMAN analysis of transcripts associated with (A) glycolysis, (B) mitochondrial ETC, and (C) chloroplastic ETC. Each rectangle represents a single transcript. Red and blue colors indicate increase and decrease in *shot1-2* compared to wild-type, respectively. Scale bars represent log<sub>2</sub> fold ratio of *shot1-2* to wild-type.

**Supplemental Table 1. GO analysis of differentially regulated transcripts in 22 °C-grown wild-type and *shot1-2* plants**

A total of 700 differentially regulated genes were chosen for GO enrichment analysis based on the cut-off values,  $p < 0.05$  and  $\log_2$  fold ratio  $> 0.5$ . The percentage of expected representation in the whole genome is also shown along with False Discovery Rate (FDR). Number of genes up- or down-regulated in *shot1-2* is shown in parenthesis.

| GO Terms                                                             | Observed (%)<br>(Up/Down) | Expected (%) | FDR      |
|----------------------------------------------------------------------|---------------------------|--------------|----------|
| <b>Biological Process</b>                                            |                           |              |          |
| response to stimulus (GO:0050896)                                    | 27.14 (109/81)            | 12.08        | 4.00E-23 |
| response to stress (GO:0006950)                                      | 18.71 (77/54)             | 6.89         | 1.70E-21 |
| response to chemical stimulus (GO:0042221)                           | 15.86 (58/53)             | 6.17         | 3.50E-16 |
| response to oxidative stress (GO:0006979)                            | 4.86 (14/20)              | 1.00         | 1.80E-10 |
| response to abiotic stimulus (GO:0009628)                            | 9.57 (36/31)              | 4.19         | 3.60E-07 |
| secondary metabolic process (GO:0019748)                             | 4.71 (23/10)              | 1.50         | 7.40E-06 |
| response to biotic stimulus (GO:0009607)                             | 5.29 (32/5)               | 1.92         | 2.30E-05 |
| response to other organism (GO:0051707)                              | 5.00 (30/5)               | 1.78         | 2.90E-05 |
| lipid transport (GO:0006869)                                         | 2.43 (11/6)               | 0.50         | 5.00E-05 |
| lipid localization (GO:0010876)                                      | 2.43 (11/6)               | 0.57         | 0.00024  |
| toxin metabolic process (GO:0009404)                                 | 1.43 (9/1)                | 0.18         | 0.00024  |
| <b>Molecular Function</b>                                            |                           |              |          |
| antioxidant activity (GO:0016209)                                    | 4.00 (10/18)              | 0.51         | 1.30E-12 |
| peroxidase activity (GO:0004601)                                     | 3.57 (8/17)               | 0.41         | 1.60E-12 |
| oxidoreductase activity, acting on peroxide as acceptor (GO:0016684) | 3.57 (8/17)               | 0.41         | 1.60E-12 |
| oxidoreductase activity (GO:0016491)                                 | 10.14 (33/38)             | 4.42         | 5.20E-08 |
| heme binding (GO:0020037)                                            | 2.29 (3/13)               | 0.34         | 1.50E-06 |
| water transmembrane transporter activity (GO:0005372)                | 1.57 (0/11)               | 0.14         | 3.30E-06 |
| water channel activity (GO:0015250)                                  | 1.57 (0/11)               | 0.14         | 3.30E-06 |
| electron carrier activity (GO:0009055)                               | 3.71 (4/22)               | 0.99         | 3.30E-06 |
| tetrapyrrole binding (GO:0046906)                                    | 2.43 (3/14)               | 0.44         | 4.40E-06 |
| disulfide oxidoreductase activity (GO:0015036)                       | 1.71 (5/7)                | 0.20         | 6.80E-06 |
| iron ion binding (GO:0005506)                                        | 2.57 (4/14)               | 0.55         | 1.50E-05 |

---

|                                                                                 |             |      |          |
|---------------------------------------------------------------------------------|-------------|------|----------|
| oxidoreductase activity, acting on sulfur group of donors (GO:0016667)          | 2.00 (6/8)  | 0.34 | 2.20E-05 |
| glutathione transferase activity (GO:0004364)                                   | 1.43 (9/1)  | 0.19 | 0.00014  |
| lipid binding (GO:0008289)                                                      | 2.86 (12/8) | 0.83 | 0.00022  |
| oxidoreductase activity, acting on phosphorus or arsenic in donors (GO:0030613) | 0.86 (1/5)  | 0.05 | 0.00037  |

---

**Supplemental Table 2. GO analysis of differentially regulated transcripts in heat-stressed wild-type and *shot1-2* plants**

Total of 484 differentially regulated genes were chosen for GO enrichment analysis based on the cut-off values,  $p < 0.05$  and  $\log_2$  fold ratio  $> 0.5$ . The percentage of expected representation in the whole genome is also shown along with False Discovery Rate (FDR). Number of genes up- or down-regulated in *shot1-2* is shown in parenthesis.

| GO Terms                                      | Observed (%)<br>(Up/Down) | Expected (%) | FDR      |
|-----------------------------------------------|---------------------------|--------------|----------|
| <b>Biological Process</b>                     |                           |              |          |
| response to stress (GO:0006950)               | 23.35 (47/66)             | 6.89         | 1.30E-26 |
| response to stimulus (GO:0050896)             | 29.96 (55/90)             | 12.08        | 2.60E-22 |
| response to chemical stimulus (GO:0042221)    | 18.39 (25/64)             | 6.17         | 4.60E-17 |
| response to abiotic stimulus (GO:0009628)     | 13.22 (30/34)             | 4.19         | 7.30E-13 |
| response to oxidative stress (GO:0006979)     | 6.40 (10/21)              | 1.00         | 8.10E-13 |
| response to temperature stimulus (GO:0009266) | 6.40 (21/10)              | 1.37         | 1.50E-09 |
| response to heat (GO:0009408)                 | 3.72 (17/1)               | 0.50         | 3.90E-08 |
| response to water (GO:0009415)                | 4.13 (5/15)               | 0.65         | 5.60E-08 |
| response to water deprivation (GO:0009414)    | 3.93 (5/14)               | 0.62         | 1.30E-07 |
| response to external stimulus (GO:0009605)    | 4.34 (8/13)               | 1.16         | 7.10E-05 |
| secondary metabolic process (GO:0019748)      | 4.75 (10/13)              | 1.50         | 0.00028  |
| response to inorganic substance (GO:0010035)  | 3.93 (10/9)               | 1.08         | 0.00032  |
| response to endogenous stimulus (GO:0009719)  | 7.44 (9/27)               | 3.15         | 0.00032  |
| response to biotic stimulus (GO:0009607)      | 5.37 (21/5)               | 1.92         | 0.00043  |
| lipid localization (GO:0010876)               | 2.69 (6/7)                | 0.57         | 0.00065  |
| lipid transport (GO:0006869)                  | 2.48 (6/6)                | 0.50         | 0.00083  |
| response to light intensity (GO:0009642)      | 1.86 (4/5)                | 0.27         | 0.00097  |

---

| Molecular Function                                                   |                |       |          |
|----------------------------------------------------------------------|----------------|-------|----------|
| oxidoreductase activity (GO:0016491)                                 | 12.60 (18/43)  | 4.42  | 3.90E-10 |
| water transmembrane transporter activity (GO:0005372)                | 2.27 (0/11)    | 0.14  | 1.60E-07 |
| water channel activity (GO:0015250)                                  | 2.27 (0/11)    | 0.14  | 1.60E-07 |
| oxidoreductase activity, acting on peroxide as acceptor (GO:0016684) | 3.10 (1/14)    | 0.41  | 6.50E-07 |
| peroxidase activity (GO:0004601)                                     | 3.10 (1/14)    | 0.41  | 6.50E-07 |
| antioxidant activity (GO:0016209)                                    | 3.31 (2/14)    | 0.51  | 1.30E-06 |
| heme binding (GO:0020037)                                            | 2.69 (1/12)    | 0.34  | 2.60E-06 |
| tetrapyrrole binding (GO:0046906)                                    | 2.89 (2/12)    | 0.44  | 5.90E-06 |
| electron carrier activity (GO:0009055)                               | 3.93 (2/17)    | 0.99  | 4.90E-05 |
| iron ion binding (GO:0005506)                                        | 2.89 (2/12)    | 0.55  | 6.00E-05 |
| catalytic activity (GO:0003824)                                      | 38.64 (58/129) | 29.64 | 0.00075  |

---



**Supplemental Table 3. Heat-responsive genes that are differentially regulated in *shot1-2***

| Locus ID      | Description                                                          | Fold change |
|---------------|----------------------------------------------------------------------|-------------|
| 22 °C control |                                                                      |             |
| AT3G04120     | glyceraldehyde-3-phosphate dehydrogenase, cytosolic (GAPC)           | 2.04        |
| AT4G37910     | mitochondrial heat shock protein 70-1 (MtHSC70-1)                    | 2.04        |
| AT5G51440     | 23.5 kDa mitochondrial small heat shock protein (HSP23.5-MI)         | 1.74        |
| AT4G21870     | 15.4 kDa nucleo-cytoplasmic small heat shock protein (HSP15.4-CV)    | 1.59        |
| AT5G02500     | heat shock cognate 70 kDa protein 1 (HSC70-1)                        | 1.43        |
| AT3G51910     | heat shock transcription factor family protein HSF A7A               | -1.58       |
| AT1G54400     | heat shock family protein AtAc16.6                                   | -1.63       |
| Heat          |                                                                      |             |
| AT1G71000     | DNAJ heat shock N-terminal domain-containing protein                 | 2.71        |
| AT5G51440     | 23.5 kDa mitochondrial small heat shock protein (HSP23.5-MI)         | 1.96        |
| AT3G09440     | heat shock cognate 70 kDa protein 3 (HSC70-3)                        | 1.94        |
| AT3G25230     | peptidyl-prolyl cis-trans isomerase / FK506-binding protein (ROF1)   | 1.73        |
| AT1G16030     | heat shock protein 70B (HSP70B)                                      | 1.69        |
| AT5G52640     | heat shock protein 81-1 (HSP81-1)                                    | 1.68        |
| AT5G09590     | mitochondrial heat shock protein 70-2 (MtHSC70-2)                    | 1.66        |
| AT4G21870     | 15.4 kDa nucleo-cytoplasmic small heat shock protein (HSP15.4-CV)    | 1.64        |
| AT1G59860     | 17.6 kDa class I heat shock protein (HSP17.6A-CI)                    | 1.60        |
| AT4G23100     | glutamate-cysteine ligase / gamma-glutamylcysteine synthetase (GSH1) | 1.60        |
| AT2G47180     | galactinol synthase                                                  | 1.59        |
| AT4G25200     | 23.6 kDa mitochondrial small heat shock protein (HSP23.6-MI)         | 1.57        |
| AT5G56010     | heat shock protein 81-3 (HSP81-3)                                    | 1.57        |
| AT5G56030     | heat shock protein 81-2 (HSP81-2)                                    | 1.53        |
| AT3G12580     | heat shock protein 70 (HSP70)                                        | 1.50        |
| AT1G74310     | heat shock protein 101 (HSP101)                                      | 1.49        |
| AT1G07400     | 17.8 kDa class I heat shock protein (HSP17.8-CI)                     | 1.48        |
| AT3G04120     | glyceraldehyde-3-phosphate dehydrogenase, cytosolic (GAPC)           | 1.45        |
| AT1G20440     | dehydrin cold regulated 47 (COR47)                                   | -1.90       |

**Supplemental Table 4.** Genes up-regulated in both *shot1-2* and *soldat10*. 257 genes are up-regulated in *shot1-2* ( $\log_2$  fold ratio  $> 0.5$ ) and 201 genes in *soldat10* ( $\log_2$  fold ratio  $> 1$ ) under control conditions. Eight commonly up-regulated genes are shown below.

| Locus ID  | Gene Description                                                                      | Fold<br>( <i>shot1-2</i> /Col) | Fold<br>( <i>soldat10</i> /Ler) |
|-----------|---------------------------------------------------------------------------------------|--------------------------------|---------------------------------|
| AT4G12470 | Protease inhibitor/seed storage/lipid transfer protein (LTP) family protein           | 3.01                           | 3.73                            |
| AT5G51440 | 23.5 kDa mitochondrial small heat shock protein (HSP23.5-MI)                          | 1.74                           | 3.43                            |
| AT4G12480 | Protease inhibitor/seed storage/lipid transfer protein (LTP) family protein, PEARLI 1 | 3.59                           | 2.72                            |
| AT1G80840 | WRKY family transcription factor, WRKY40                                              | 1.98                           | 2.50                            |
| AT2G43620 | Chitinase family protein                                                              | 1.53                           | 2.84                            |
| AT5G43450 | Putative 2-oxoglutarate-dependent dioxygenase                                         | 1.64                           | 2.84                            |
| AT4G21870 | 26.5 kDa class P-related heat shock protein (HSP26.5-P)                               | 1.59                           | 2.63                            |
| AT1G72900 | Toll-Interleukin-Resistance (TIR) domain-containing protein                           | 1.55                           | 2.11                            |

**Supplemental Table 5.** List of genes and primer sequences used in estimation of mitochondrial and plastid genome copy numbers. Primer sequences are given in 5'→3' orientation.

| Gene (Locus ID)          | Forward                   | Reverse                |
|--------------------------|---------------------------|------------------------|
| Nuclear genes            |                           |                        |
| AT1G19290                | TTGTTCAAGCTTGGCGATTT      | TGGCTTCATTGACCTTCTCC   |
| AT3G48810                | GGTAGATGGTGCGAAGAAGC      | CAAACCAACCTCACACATCG   |
| AT4G18750                | CTCAGATCGGCATGTTGCTA      | CCCGCTTGTCTCATTGATT    |
| <i>RPL5B</i> (AT5G39740) | CAGAAGACCTTTCCGTGCTC      | CAAACACACGGTTTCCAGTG   |
| <i>POR</i> (AT1G10390)   | CTTCGGTGCCTCAAACCTCTC     | TTGAAGCTCCAAAAGCACCT   |
| Mitochondrial genes      |                           |                        |
| <i>nad3</i>              | CGAATGTGGTTTCGATCCTT      | GCACCCCTTTTCCATTCATA   |
| <i>nad4L</i>             | GGGGAATCCTCCTTAATAGACG    | AACGAAAATGGCTAACCCAATA |
| <i>nad6</i>              | TATGCCGGAAGGTACGAAG       | GTGAGTGGGTCAGTCGTCCT   |
| <i>nad9</i>              | GGATGACCCTCGAAACCATA      | CACGCATTTCGTGTACAAACC  |
| <i>matR</i>              | AATTTTTGCGAGAGCTGGAA      | TTGAACCCCGTCCTGTAGAC   |
| Plastid genes            |                           |                        |
| <i>petN</i>              | CGCATGGGCTGCTTTAAT        | GAGTCCACTTCTTCCCCACA   |
| <i>ndhC</i>              | TATAGAACCGATCGGGGATG      | AACTCATTGCCACGGATAC    |
| <i>atpE</i>              | TCCACAAGAAGCTCAGCAA       | GTGTCCGAGCTCGTCTGAG    |
| <i>atpB</i>              | CCGTTTCGTACAAGCAGGAT      | CGGGGTCAGTCAAATCATCT   |
| <i>petG</i>              | TCTAATTCCTATTACTTTGGCTGGA | CCAACTGATCACCACGTCTG   |

**Supplemental Table 6.** Changes in transcript levels of mitochondrial ETC components.

| Locus ID  | Gene Description                                                              | Fold ( <i>shot1-2/Col</i> ) | p-value |
|-----------|-------------------------------------------------------------------------------|-----------------------------|---------|
| AT4G28510 | PROHIBITIN 1 (PHB1), constituent of mitochondrial respiratory chain complex I | 1.32                        | 0.0448  |
| AT4G05020 | NAD(P)H Dehydrogenase B2 (NDB2)                                               | 1.57                        | 0.0030  |
| AT2G43400 | Electron-Transfer Flavoprotein:Ubiquinone Oxidoreductase (ETFQO)              | 0.73                        | 0.0311  |
| AT3G22370 | Alternative Oxidase 1a (AOX1a)                                                | 1.61                        | 0.0019  |
| AT3G10860 | ubiquinol-cytochrome C reductase complex ubiquinone-binding protein           | 1.34                        | 0.0246  |
| AT4G10040 | Cytochrome C-2 (CYTC-2)                                                       | 1.30                        | 0.0405  |
| AT1G22840 | Cytochrome C-1 (CYTC-1)                                                       | 1.39                        | 0.0248  |
| AT1G53030 | Cytochrome C Oxidase Copper Chaperone (COX17)                                 | 1.32                        | 0.0318  |
| AT1G69750 | Cytochrome C Oxidase 19-2 (COX19-2)                                           | 1.31                        | 0.0358  |
| AT5G58970 | Uncoupling Protein 2 (UCP2)                                                   | 1.53                        | 0.0440  |
| AT3G54110 | Plant Uncoupling Mitochondrial Protein (PUMP), Uncoupling Protein 1 (UCP1)    | 1.43                        | 0.0124  |
| AT5G13450 | ATP Synthase delta subunit (ATP5)                                             | 1.32                        | 0.0401  |
| AT1G51650 | ATP Synthase epsilon subunit                                                  | 1.33                        | 0.0381  |

**Supplemental Table 7.** List of primer sequences used in the qRT-PCR for the validation of microarray experiments and generation of biotinylated complementary RNA (cRNA) probes. Primer sequences are given in 5'→3' orientation.

| Locus ID                       | Forward                       | Reverse                                       |
|--------------------------------|-------------------------------|-----------------------------------------------|
| <i>MtHSC70-1</i> (AT4G37910)   | GGGTACAAGTGGGACTGAGC          | CATCCGGGACTCTCAATAGG                          |
| <i>MtHSC70-2</i> (AT5G09590)   | CACCCGAAATACAACCATCC          | CCTCTTGGAGATGGAATGCC                          |
| <i>HsFA2</i> (AT2G26150)       | CAGCGTTGGATGTGAAAAGTG         | CCATAACTTAGACCGCAACAA                         |
| <i>HSC70-3</i> (AT3G09440)     | GATGTTCTCCTTCTGCCGG           | CAAGCGAGCCCTCAAATAG                           |
| <i>HSP70B</i> (AT1G16030)      | TTGCAACCCAATCATCTCAA          | TGGTCCAAAGCCACTCTTTC                          |
| <i>HSP23.5-MI</i> (AT5G51440)  | GCGGAAATGAAGAATGGTGT          | ACACATAGGACCGTGGGAAA                          |
| <i>HSP81-1</i> (AT5G52640)     | GGAAGATGGTGATATGCCTGA         | TGACACAAACCCAACCCTAGA                         |
| <i>DnaJ</i> (AT1G71000)        | GCTCGTACGACGTTGGACTC          | TTGCATTGATTGGTTCTGGA                          |
| <i>HSP17.6A-CI</i> (AT1G59860) | TGATTTGAGTTCTCTCTGGGTCT       | CAAATACACACATTTCTCCACCA                       |
| Reference gene (AT2G32170)     | ATCGAGCTAAGTTTGGAGGATGTAA     | TCTCGATCACAAACCCAAAATG                        |
| <i>ccmF<sub>C</sub></i>        | ACTATTGAAATGGTTCGTCAGTAGAGATG | taatacactactatagggCGCTTCGCTGACCTA<br>TCGC     |
| <i>cox1</i>                    | GTAGGTAGCGGCACTGGGTG          | taatacactactatagggATACCGAATCCAGG<br>CAGAATGAG |
| <i>atp9</i>                    | CATAAGAGAAGACGAAGACGG         | taatacactactatagggCTCACGCTTTGTCAT<br>TCACTTA  |
| <i>psbA</i>                    | AGGTTACAGATTCGGGCAAGA         | taatacactactatagggAGCCTCAACAGCAG<br>CTAGGTC   |
| <i>atpB</i>                    | GAACCGCCAGGAGCTCGTATG         | taatacactactatagggTGGCAGGTGCGGGG<br>TCAGTC    |

**Supplemental Table 8.** List of primer sequences used in the qRT-PCR of mitochondrial transcripts. Primer sequences are given in 5'→3' orientation.

| Transcript (Locus ID) | Forward                     | Reverse               |
|-----------------------|-----------------------------|-----------------------|
| <i>rpl2</i>           | CCGAAGACGGATCAAGGTAA        | CGCAATTCATCACCAATTTG  |
| <i>rpl5</i>           | AAGGGGTTTCGACAGGAAAGT       | CGTATTTTCGACCGGAAAATC |
| <i>rpl16</i>          | GAGCATTTGCCAAACTCACA        | CGGACACTTTCATCGTGCTA  |
| <i>rps3</i>           | CCGATTTTCGGTAAGACTTGG       | AGCCGAAGGTGAGTCTCGTA  |
| <i>rps4</i>           | ACCCATCACAGAGATGCACA        | TCACACAAACCCTTCGATGA  |
| <i>rps7</i>           | CTCGAACTGAACGCGATGTA        | AAGCTGCTTCAAGGATCCAA  |
| <i>rps12</i>          | AGCCAAAGTACGGTTGAGCA        | TTTGGGTTTTTCTGCACCAT  |
| <i>matR</i>           | AATTTTTGCGAGAGCTGGAA        | TTGAACCCCGTCTGTAGAC   |
| <i>mttB</i>           | GGGGTCTTTCTTTGGAAACC        | TCTCCCTCATTCCACTCGTC  |
| <i>cob</i>            | TGCCGGAATGGTATTTCTA         | GCCAAAAGCAACCAAAACAT  |
| <i>cox1</i>           | GTAGCTGCGGTGAAGTAGGC        | CTGCCTGGATTCGGTATCAT  |
| <i>cox2</i>           | TGATGCTGTACCTGGTCGTT        | TGGGGGATTAATTGATTGGA  |
| <i>cox3</i>           | CCGTAACCTGGGCTCATCAT        | AAACCATGAAAGCCTGTTGC  |
| <i>ccmB</i>           | TCTTGGAAATCACATCCAGCA       | CGAGACCGAAATTGGAAAAA  |
| <i>ccmC</i>           | CGTGTCGTTTCGTAATGGAAA       | GCCGTGGCGATATAACAAT   |
| <i>ccmFc</i>          | CACATGGAGGAGTGTGCATC        | GTGGGTCCATGTAAATGATCG |
| <i>ccmFN1</i>         | AGCTCTTGGCATTGCTTTGT        | AGTGCCACAATCCCATTCAT  |
| <i>ccmFN2</i>         | CGTGTCGTTTCGTAATGGAAA       | TGATAAGCCCACTTCC      |
| <i>atp1</i>           | TCACTTCGACACGTCTTTGC        | GGAATGGCCTTGAATCTTGA  |
| <i>atp4</i>           | GGATCAGCTTGCGAATTTGT        | GCAAATTGCTTCCCCACTAA  |
| <i>atp6-1</i>         | TCTTTTTCGAGTCAATGCAC        | TCTCGCGTATCTCACATTGC  |
| <i>atp6-2</i>         | GCTTGGCAATCCTTGGTAGA        | GACCAAGATGCAAGGGAAAA  |
| <i>atp8</i>           | CCGTCGACTTATTGGGAAAA        | TTCCTTGGCCATGTACAACA  |
| <i>atp9</i>           | GGAGCTGCTATCGGTATTGG        | TAGAGCAAAGCCCAAAATGG  |
| <i>nad1 ex1-2</i>     | GACCAATAGATACTTCATAAGAGACCA | TTGCCATATCTTCGCTAGGTG |
| <i>nad1 ex2-3</i>     | TCTGCAGCTCAAATGGTCTC        | ATTCAGCTTCCGCTTCTGG   |
| <i>nad1 ex4</i>       | AAAAGAGCAGACCCCATGTA        | GGGAGCTGTATGAGCGGTAA  |
| <i>nad1 ex5</i>       | AGCCCGGGATCTTCTTGA          | ACGGAGCTGCATCCCTACT   |
| <i>nad2a</i>          | GGATCCTCCCACACATGTTT        | GCGAGCAGAAGCAAGGTTAT  |
| <i>nad2b</i>          | TATTTGTTCTTCGCCGCTTT        | CAAAGGAGAGGGGTATAGCAA |
| <i>nad3</i>           | CGAATGTGGTTTCGATCCTT        | GCACCCCTTTTCCATTCATA  |

|                                        |                           |                           |
|----------------------------------------|---------------------------|---------------------------|
| <i>nad4</i>                            | AATACCCATGTTTCCCGAAG      | TGCTACCTCCAATTCCCTGT      |
| <i>nad4L</i>                           | GGGGAATCCTCCTTAATAGACG    | AACGAAAATGGCTAACCCAATA    |
| <i>nad5 ex1-2</i>                      | TGGACCAAGCTACTTATGGATG    | CCATGGATCTCATCGGAAAT      |
| <i>nad5 ex4-5</i>                      | AACATTGCAAAGGCATAATGA     | GTTCTGCGTTTTCCGATAT       |
| <i>nad6</i>                            | TATGCCGGAAAGGTACGAAG      | GTGAGTGGGTCAGTCGTCCT      |
| <i>nad7</i>                            | ACTGTCACTGCACAGCAAGC      | CATTGCACAATGATCCGAAG      |
| <i>nad9</i>                            | GGATGACCCTCGAAACCATA      | CACGCATTTCGTGTACAAACC     |
| <i>18S mito</i>                        | CGTCACCTGGGTCAAAAACCT     | GCTTGAAAACCGAAGTGAGC      |
| <i>26S mito</i>                        | GACGAGACTTTCGCCTTTTG      | CTTGGAGCGAATTGGATGAT      |
| <i>nucl 18S rRNA (AT3G41768)</i>       | AAACGGCTACCACATCCAAG      | ACTCGAAAGAGCCCGGTATT      |
| <i>YLS8 (AT5G08290)</i>                | GGGATGAGACCTGTATGCAGATGGA | GCTCGTACATGGTGTGAAGTCTGG  |
| <i>RPL5B (AT5G39740)</i>               | CAGAAGACCTTCCCGTGCTC      | CAAACACACGGTTTTCCAGTG     |
| <i>TUB6 (AT5G12250)</i>                | GGTGAAGGAATGGACGAGAT      | GTCATCTGCAGTTGCGTCTT      |
| <i>UBC (AT5G25760)</i>                 | TTCGTTCTCTTTGGGAAATTAGA   | CTCGCTGTACCTCTTTGTATTCTTT |
| <i>ACTIN2-8 (AT3G18780, AT1G49240)</i> | GGTAACATTGTGCTCAGTGGTGG   | AACGACCTTAATCTTCATGCTGC   |

**Supplemental Table 9.** List of primer sequences used in the qRT-PCR of plastid transcripts. Primer sequences are given in 5' → 3' orientation.

| Transcript (Locus ID) | Forward                   | Reverse                   |
|-----------------------|---------------------------|---------------------------|
| <i>accD</i>           | TGTGGATTCAATGCGACAAT      | TTTTGCGCAGAGTCAATACG      |
| <i>atpA</i>           | CGGAAATCTTACCTCGACCA      | ATGGGTGACGGTTTGATGAT      |
| <i>atpB</i>           | CCGTTTCGTACAAGCAGGAT      | CGGGGTCAGTCAAATCATCT      |
| <i>atpE</i>           | TCCACAAGAAGCTCAGCAAA      | GTGTCCGAGCTCGTCTGAG       |
| <i>atpF</i>           | GCTCCTTCACGCAGTTCTTC      | TACTTGGGTCACTGGCCATC      |
| <i>atpH</i>           | ATCCACTGGTTTCTGCTGCT      | TTCCTTCTGCCTCAGGTTGT      |
| <i>atpI</i>           | ATTGGCAAATAGGGGGTTTC      | GCCGTCAGTTGGAATTGTTT      |
| <i>ccsA</i>           | CACAATAACTGCGCCAAGTG      | AACAGAGCGCCATAGCCTAA      |
| <i>cemA</i>           | TTTGCCCTGGTTGATCTCTC      | TTGGATCGTTTCTTTGTGGA      |
| <i>ClpPI</i>          | GTCGGAGGAGCAATTACCAA      | GTGATGGTTTCGCGAAGTTT      |
| <i>matK</i>           | ATCCTTTGTTGCCAGAATGC      | TTTTTCTACGCAAGCGGTCT      |
| <i>ndhA</i>           | TTGACGCCACAAATTCCAT       | TTAGGTGGTCTGCGAGCTG       |
| <i>ndhB</i>           | CCAGAAGAAGATGCCATTCA      | TCATCAATGGACTCCTGACG      |
| <i>ndhC</i>           | TATAGAACCGATCGGGGATG      | AACTCATTGCCACGGATAC       |
| <i>ndhD</i>           | TGGAGAATGGGAATAGATGGAC    | TCCCGAGAAGAAAATGATCCTA    |
| <i>ndhE</i>           | TGGATTGATCACAAGTCGAAA     | AGCGGCTGCAATTGCTATAA      |
| <i>ndhF</i>           | CGGCGGGTATTTTTCTTGTA      | GGCTAAACCCCGCTTAATGT      |
| <i>ndhG</i>           | TTGCCTGGACCAATACATGA      | ACATTTATGGCCCCACATA       |
| <i>ndhH</i>           | ATGGGAAATTCAATGGCAAA      | TCAAAGCCCCTGCTTTCTAA      |
| <i>ndhI</i>           | TTTGCTGTTGTTGATTGGA       | ATTGGTAAACGACCCAAAGC      |
| <i>ndhJ</i>           | CGTTTTCTGGGTTTGGAAA       | AGGCCACCCTATCCAACCTCT     |
| <i>ndhK</i>           | GCAGTCCGCATATTGAAAT       | CGTGGGACGATACTGGACTT      |
| <i>petA</i>           | CAGAGGGCGAATCCATTA        | GCCAAAACAACCGATCCTAA      |
| <i>petB</i>           | ATTGGGCGGTCAAATGTA        | AGACGGCCGTAAGAAGAGGT      |
| <i>petD</i>           | TCCTTTTGCAACTCCTTTGG      | CCGCTGGTACTGAAACCATT      |
| <i>petG</i>           | TCTAATTCCTATTACTTTGGCTGGA | CCAATGATCACCACGTCTG       |
| <i>petI</i>           | TTTCGGTTTTCTACTAGCAGCTT   | TGCTTAGACCAATAAACAGAACTGA |
| <i>petN</i>           | CGCATGGGCTGCTTTAAT        | GAGTCCAATTCTTCCCCACA      |
| <i>psaA</i>           | GCCAAGAAATCCTGAATGGA      | CATCTTGGAACCAAGCCAAT      |
| <i>psaB</i>           | GGACCCCACTACTCGTCGTA      | ATTGCTAATTGCCGAAATG       |
| <i>psaC</i>           | GAGCATGCCCTACAGACGTA      | CAGGCGGATTCACATCTCTT      |



|               |                            |                             |
|---------------|----------------------------|-----------------------------|
| <i>psaI</i>   | ACTTACCCTCTATTTTTGTGCCTTT  | TGAATATGAAGAAATAAAGAAGCCATT |
| <i>psaJ</i>   | ATGGTTCGGTTCGTTAGCAG       | GGGAAATGTTAATGCATCTGG       |
| <i>psbA</i>   | GAGCAGCAATGAATGCGATA       | CCTATGGGGTCGTTCTGTGA        |
| <i>psbB</i>   | CGTGCGACTTTGAAATCTGA       | TAGCACCATGCCAAATGTGT        |
| <i>psbC</i>   | ACTTCCCCACCTAGCCACTT       | AGCCCAAACTGCAGAAGAA         |
| <i>psbD</i>   | CACAAATCTTTGGGGTTGCT       | CCATCCAAGCACGAATACCT        |
| <i>psbE</i>   | TGTCTGGAAGCACAGGAGAA       | AACCGGTGCTGACGAATAAC        |
| <i>psbF</i>   | GGACCTATCCAATTTTTACAGTGC   | GTTGGATGAACTGCATTGCT        |
| <i>psbH</i>   | TCTAGATCTGGTCCAAGAAGCA     | CATTGCAACACCCATCAAAG        |
| <i>psbI</i>   | TTTCTCTCTTCATATTTGGATTCTT  | TTCTTCACGTCCCGGATTAC        |
| <i>psbJ</i>   | CTGGAAGGATTCTCTTTGG        | CAGGGATGAACCTAATCCTGA       |
| <i>psbK</i>   | AGGCCTACGCCTTTTTGAAT       | CGAAAACCTACAGCGGCTTG        |
| <i>psbL</i>   | CAATCAAATCCGAACGAACA       | GAAATAATTCGAAAATAAACAGCAA   |
| <i>psbM</i>   | TGCACTCTTCATTCTCGTTCC      | TCATTTTGACTAACGGTTTTTACG    |
| <i>psbN</i>   | GGAAACAGCAACCCTAGTCG       | CGTGTTCCCTCGAATGGATCT       |
| <i>psbT</i>   | GGAAGCATTGGTTTATACATTTCTCT | AAATTTTAGGTGGTTCCCGAAA      |
| <i>psbZ</i>   | TGCTTTCCAATTGGCAGTTT       | GTTACTCGACCAACCATCAGG       |
| <i>rbcL</i>   | GTGTTGGGTTCAAAGCTGGT       | CATCGGTCCACACAGTTGTC        |
| <i>rpL14</i>  | AGCGGGGCTAGAGAATTGAT       | ACTGCGGCATTGTCATCATA        |
| <i>rpL16</i>  | TGTACGACGTGGTGAAAAA        | GCATTTTTGATGCCGCTATT        |
| <i>rpL2</i>   | CGGACCTCTCCAGAAGGTAAT      | AAATGGGAAATGCCCTACCT        |
| <i>rpL20</i>  | TCGGAGGCGTAGAACAAAAC       | CGATGAGCCGAAACTAAAGC        |
| <i>rpL22</i>  | AAAGCTGAGGTGAACCAAGG       | TGTCCCATAGGCCTCCACTA        |
| <i>rpL23</i>  | CGGTTATTGGGGAAAAATCA       | TTTTAACCTTTCCGGGGAGT        |
| <i>rpL32</i>  | CTCGAAAAAGCGTATTCGTAAAA    | TGAAAAAGCTTTCAACGATGTC      |
| <i>rpL33</i>  | GCCAAGGGTAAAGATGTTTCG      | TTGATTTCCCGTGAATTGT         |
| <i>rpL36</i>  | AAATAAGGGCTTCGTTTCGT       | CCTCGGGTTGGAACAAATTA        |
| <i>rpoA</i>   | GCGATGCGAAGAGCTTTACT       | CCAGGACCTTGGACACAAAT        |
| <i>rpoB</i>   | AAAAAGCACGGATACGGATG       | CTTCTTGAATGCCCCGATTA        |
| <i>rpoC1</i>  | TCGGATACGAAGATATCAAATGG    | TTAGTTATGGCCTAGCAAAAAGA     |
| <i>rpoC2</i>  | ATGGAGCCCCTAAAGGAGTT       | CGTCTGCTAAGACACGACCA        |
| <i>rpS11</i>  | TACTTGTGGATTCCGGGGTA       | CAGCTCGTTGCATACCTTGA        |
| <i>rpS12A</i> | TCTCACACCGGGTAAATCCT       | ATCCGAAACGTCACGAAATC        |
| <i>rpS14</i>  | AATCCCCACCGCGTAATAGT       | AACATGCCTGAACCATTTC         |
| <i>rpS15</i>  | CAGGGGATCCGTTGAATTT        | CGTTGACGTTTTCCAGAAT         |

|                                              |                           |                           |
|----------------------------------------------|---------------------------|---------------------------|
| <i>rpS18</i>                                 | CAAGCGATCTTTTCGTAGGC      | AAAGTCACTCTATTCACCCGTCT   |
| <i>rpS19</i>                                 | CACAATGATTGGCCATACGA      | TTTGGCATGTCCTCGAAAAT      |
| <i>rpS2</i>                                  | GGGCTCGGTGTCATTATGTT      | TCTTCAACACAGCTGCATCC      |
| <i>rpS3</i>                                  | CAATCCGTATGGGGATCCTA      | GATCCATTCAACACGTGCAA      |
| <i>rpS4</i>                                  | CGATTGGGTATGGCTTTGAC      | ATGGTTTGGCAATTCCTCAG      |
| <i>rpS7</i>                                  | AAACTGCAAAATCCGATCCA      | ATGAGTTGACCCGCCTACAC      |
| <i>rpS8</i>                                  | CGACCGGGTCTACGAATCTA      | ATTTCTCCGCCGATTCTTTT      |
| <i>ycf1</i>                                  | TTTCGGAAGAAGGGGAAGAT      | TTCGAACGTGGAATTCATCA      |
| <i>ycf15</i>                                 | GCGAACAACCGGAGCTATTA      | CCGACATGCGTATTTTTGATT     |
| <i>ycf2.1</i>                                | TAGCCCTCGGTCTATTGGTG      | GGATCCACTTTTTTGGGGAAT     |
| <i>ycf3</i>                                  | TCCAATACTCAGCGGCTTG       | TTCGGGCATTAGAACGAAAC      |
| <i>ycf4</i>                                  | TTTCTATGGGATCGCAGGTC      | GGAAATCCCCAACGAAAAT       |
| <i>rRNA 23S</i>                              | GGGCGACTGTTTACCAAAAA      | TTACCCGACAAGGAATTCG       |
| <i>rRNA 16S</i>                              | CGGTATCTGGGGAATAAGCA      | GATTTGACGGCGGACTTAAA      |
| <i>nucl 18S rRNA (AT3G41768)</i>             | AAACGGCTACCACATCCAAG      | ACTCGAAAGAGCCCGGTATT      |
| <i>YLS8 (AT5G08290)</i>                      | GGGATGAGACCTGTATGCAGATGGA | GCTCGTACATGGTGTGAAGTCTGG  |
| <i>RPL5B (AT5G39740)</i>                     | CAGAAGACCTTTCCGTGCTC      | CAAACACACGGTTTCCAGTG      |
| <i>UBC (AT5G25760)</i>                       | TTCGTTCTCTTTGGGAAATTAGA   | CTCGCTGTACCTCTTTGTATTCTTT |
| <i>ACTIN2-8 ( AT3G18780, AT1G49240)</i>      | GGTAACATTGTGCTCAGTGGTGG   | AACGACCTTAATCTTCATGCTGC   |
| <i>Nucleoporin autopeptidase (AT1G10390)</i> | CTTCGGTGCCTCAAACCTCTC     | TTGAAGCTCCAAAAGCACCT      |

## Supplemental References

- Frugoli, J.A., Zhong, H.H., Nuccio, M.L., McCourt, P., McPeck, M.A., Thomas, T.L., McClung, C.R.** (1996). Catalase is encoded by a multigene family in *Arabidopsis thaliana* (L.) Heynh. *Plant Physiol.* **112**, 327-336.
- Miura, E., Kato, Y., Sakamoto, W.** (2010). Comparative transcriptome analysis of green/white variegated sectors in *Arabidopsis yellow variegated2*: responses to oxidative and other stresses in white sectors. *J. Exp. Bot.* **61**, 2433-2445.
- Sheen, J.** (1995). Methods for Mesophyll and Bundle Sheath Cell Separation. In *Methods in Cell Biology* (Academic Press), pp. 305-314.
